# Supplementary material for: Retrievals of dust-related particle mass and ice-nucleating particle concentration profiles with ground-based polarization lidar and sun photometer over a central China megacity
Source: Copernicus journal article supplement (doi:10.5194/amt-2021-83), 2021-04-14
Supplement: Supplementary file [file amt-2021-83-RC1-supplement.pdf]

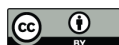

# Retrievals of dust-related particle mass and ice-nucleating particle concentration profiles with ground-based polarization lidar and sun photometer over a central China megacity

Yun He<sup>1,2,3</sup>, Yunfei Zhang<sup>1,2,3</sup>, Fuchao Liu<sup>1,2,3</sup>, Zhenping Yin<sup>1,2,3</sup>, Yang Yi<sup>1,2,3</sup>, Yifan Zhan<sup>1,2,3</sup>, Fan Yi<sup>1,2,3</sup>

<sup>1</sup> School of Electronic Information, Wuhan University, Wuhan 430072, China.

<sup>2</sup> Key Laboratory of Geospace Environment and Geodesy, Ministry of Education, Wuhan 430072, China.

<sup>3</sup> State Observatory for Atmospheric Remote Sensing, Wuhan 430072, China.

Correspondence to: Yun He ([heyun@whu.edu.cn](mailto:heyun@whu.edu.cn))

**Abstract.** The POLIPHON (Polarization Lidar Photometer Networking) method is a powerful pathway to retrieve the height profiles of dust-related particle mass and ice-nucleating particles (INP) concentrations. The conversion factors fitted from the sun photometer observation data are the major part of the POLIPHON computations, which can convert the polarization-lidar-derived dust extinction coefficients into the dust-related particle mass and INP concentrations. For a central China megacity Wuhan (30.5°N, 114.4°E), located at the downstream area several thousands of kilometers far away from the source regions of Asian dust, dust particles always mix with other aerosols from local emission. Therefore, very few dust case data sets can be available when using the column-integrated Ångström exponent (for 440–870 nm) < 0.3 and aerosol optical depth (at 532 nm) > 0.1 recorded by sun photometer as the filtering criteria. Instead, we present another dust-case data-set screening scheme that applies the simultaneous polarization lidar observation to verify the occurrence of dust. Based on the 33 dust-intrusion days identified during 2011–2013, the extinction-to-volume ( $c_{v,d}$ ) and extinction-to-large particle (with radius > 250 nm) number concentration ( $c_{250,d}$ ) conversion factors are determined to be  $0.52 \times 10^{-12} \text{ Mm m}^3 \text{ m}^{-3}$  and  $0.11 \text{ Mm cm}^{-3}$ , respectively. They are both smaller than those observed at Lanzhou SACOL (36.0°N, 104.1°E), a site closer to the Gobi Desert, due to the partial dust sedimentation during transport. The conversion factors are applied in a dust event in Wuhan to reveal the typical dust-related INP concentration over East Asia city. The proposed dust-case data-set screening scheme may potentially be extended to the other polluted city sites more influenced by mixed dust.

## 1 Introduction

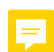

Aerosol-cloud interactions, also named ‘aerosol indirect effects’, significantly impact the global climate [Rosenfeld et al., 2014]. The interactions show an overall cooling effect on radiative forcing, while with the largest uncertainty, meaning that they are still poorly understood and thus not well represented in the climate model [IPCC, 2013]. Heterogeneous nucleation



30 is one of the most important aerosol-cloud interactions for mixed-phased clouds, which are essential to cloud electrification and the production of precipitation [Rosenfeld et al., 2008; Mülmenstädt et al. 2015]. At temperatures ranging from -38 °C to 0- °C, ice crystals within the mixed-phase cloud are primarily produced via heterogeneous freezing with some types of insoluble aerosols acting as ice-nucleating particles (INPs) [Cantrell and Heymsfield, 2005].

Numerous types of aerosols can be served as INP as reviewed by Murray et al. [2012] and Kanji et al. [2017], including  
 35 mineral dust, biological material, volcanic ash, etc. Dust ~~particle~~ is the dominant type accounting for 77-% of active INPs ubiquitous all over the world and thus provides a great opportunity to study heterogeneous nucleation [Hoose et al. 2010]. In principle, one INP can correspondingly form one ice crystal particle except for the occurrence of ice multiplication mechanism (also named Hallett-Mossop process) at temperatures of -3 to -8- °C [Hallett and Mossop, 1974]. This agreement was substantially verified by a closure study on dust-related altocumulus and cirrus layers, which compared the lidar-derived  
 40 ice-nucleating particle concentration (INPC) with the radar-derived ice crystal number concentration (ICNC) and found that the discrepancy between them was within one order of magnitude [Ansmann et al., 2019a]. Therefore, it is of significant importance to quantitatively estimate INPC profiles, which provides an approach to evaluate the ICNC parameterization that may be necessary for ~~the~~ climate model.

The POLIPHON (Polarization Lidar Photometer Networking) method, first introduced by Ansmann et al. [2012], is able to  
 45 retrieve the height profiles of dust-related INPC and dust mass concentration. In this approach, two remote sensing instruments ~~of~~ lidar and sun photometer together with INP parameterization scheme are employed [Mamouri and Ansmann, 2014, 2015, 2016; Mamali et al., 2018; Ansmann et al., 2019a, 2019b, 2020; Hofer et al., 2020]. Marinou et al. [2019] compared the INPC profiles retrieved by lidar observation with those measured by unmanned aerial vehicles (UAVs). A good coincidence within one order of magnitude was found applying the parameterization scheme U17-D from Ullrich et al.  
 50 [2017], meaning that the POLIPHON method is a promising approach to retrieve the INPC height profiles. Furthermore, the cost of such a remote sensing approach is much less than the airborne in site observation, making it applicable for ~~the~~ long-term INPC monitoring both locally and globally.

To retrieve the dust-related INPC profiles, the most significant aspect is the estimation of dust-related conversion factors that can convert the dust extinction ~~efficient~~ to large particle (with radius >250 nm) number concentration and dust mass  
 55 concentration. For the regions in or near ~~the~~ desert, pure or quasi-pure dust cases frequently occur with less influence from other aerosol emissions. Ansmann et al. [2019b] obtained the dust conversion factors for those Aerosol Robotic Network (AERONET) sites in or near the desert regions with the filtering criteria of an Ångström exponent (AE) for the 440-870 nm wavelength range AE <0.3 and a 532 nm (converted from 500 nm) aerosol optical depth (AOD) >0.1. The pure-dust-case data sets following the criteria given above can be found in quantity as shown by Ansmann et al. [2019b] (with adequate data  
 60 ~~sets~~ >2500 for each site). However, very few such data sets are available as seen in sun photometer observation for those cities located at the downstream regions of Asian dust, if such filtering criteria are applied. For example, the local aerosol emissions are always accompanied during the dust-intrusion days in a central China megacity, Wuhan (30.5 °N, 114.4 °E) (see Figure 1) [Kong and Yi, 2015; Ma et al., 2019], making the sun photometer-measured column-integrated aerosol

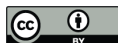

properties as the mixture of dust particles and other aerosols (i.e. mixed dust, usually with a lidar-measured particle polarization ratio  $<0.3$ ). Urban air pollution generally cannot affect the atmospheric INPC [Chen et al., 2018], thus it is possible to extract the dust-related INPC for mixed dust situations even in a megacity influenced by long-range transported dust plumes [Córdoba-Jabonero et al., 2018; Mamouri and Ansmann, 2017]. To retrieve the possible dust-related conversion factors for Wuhan (probably be the mixed dust situation) that may be further applied in the POLIPHON algorithm, we present another dust-case-selection scheme that uses simultaneous observations from the ground-based polarization to verify the occurrence of dust in this work. Therefore, the height profiles of INPC and dust mass concentration can be successfully obtained at Wuhan.

The organization of this paper is as follows. We first briefly introduce the relevant instruments and data. The following section shows the primary steps of the POLIPHON method as well as the retrieval scheme of two dust-related conversion factors for Wuhan. In Sect. 4, we present a case study on the dust-related heterogeneous nucleation process at Wuhan using the method given in Sect. 3. In the last section, conclusions and discussions are presented.

## 2 Instrumentation and Meteorological Data

### 2.1 Polarization Lidar

A zenith-pointed ground-based polarization lidar, installed at an atmospheric observatory on the campus of Wuhan University located at Wuhan, China (30.5° N, 114.4° E, ~80 m above sea level, the exact location can be seen in Figure 1), was employed to observe the transported dust aerosols [He et al, 2015] as well as the ice formation within the mixed-phase cloud routinely [He et al, 2021a, 2021b; Yin et al., 2021]. The lidar system has been described in detail by Zhang et al. [2014] and Kong and Yi [2015] and enables us to obtain the height profiles of the aerosol extinction coefficient (if assuming a typical local lidar ratio), aerosol backscatter coefficient, and volume/particle depolarization ratio at 532 nm. It should be mentioned that double cascaded cubic polarizing beamsplitters were used respectively for the parallel (P) and perpendicular (S) polarized channels so that the crosstalk between them can be well suppressed.

The temporal and height resolutions of lidar raw data are 1 minute and 3.75 m, respectively. The gain ratio between two orthogonally polarized channels is calibrated using the  $\Delta 90^\circ$  method [Freudenthaler et al., 2009]; the relative error for volume depolarization ratio  $\delta$  (aerosol + molecular) is less than 5%. The lidar-derived  $\delta$  is sensitive to the nonsphericity of backscattering targets, therefore can be employed in distinguishing dust aerosols from other types of spherical aerosols [He and Yi, 2015; Sakai et al., 2010]. The method from Fernald [1984] was used to retrieve the aerosol backscattering coefficient  $\beta$  and backscatter ratio  $R$ ; the uncertainties are estimated to be  $\leq 10\%$  for  $\beta$  and  $R$ . Then, the particle depolarization ratio  $\delta_p$  can be calculated by using the equation below:

$$\delta_p(z) = \frac{\delta(z)[R(z)+R(z)\delta_m-\delta_m]-\delta_m}{R(z)-1+R(z)\delta_m-\delta(z)}, \quad (1)$$

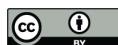

where  $\delta_m$  ( $=0.004$  for our lidar system) is the molecular depolarization ratio that is related to the specification of the narrowband filters in the receiving unit of the lidar system [Behrendt and Nakamura, 2002]. The relative uncertainty for  $\delta_p$  is generally on the order of 5-10 % [Mamouri et al., 2013].

## 2.2 Sun Photometer and GRASP Algorithm

A sun-sky scanning spectral photometer (CE-318) was installed at our observatory in April 2008 and had been operating until August 2013 ~~due to technical failure~~ [Zhang et al., 2021]. It detects the direct solar irradiance at eight wavelengths (340, 380, 440, 500, 675, 870, 1020, and 1246 nm) for every 15 minutes; the AOD at each wavelength can then be calculated following the Beer-Lambert law. The uncertainties of AOD are  $\sim 0.015$  at 440-1020 nm and  $\sim 0.035$  at 340-380 nm [Zhang et al., 2021], which is slightly larger than those (0.01-0.02) for the AERONET field instruments [Holben et al., 1998]. The sky radiance data are not available. The fine mode fraction (FMF) of 500 nm AOD was obtained based on the method given by O'Neill et al. [2003].

Generalized Retrieval of Aerosol and Surface Properties (GRASP) algorithm ~~had been~~ widely used in retrieving aerosol microphysical properties [Dubovik et al., 2014] and was reported to be applied in dust event observation [Benavent-Oltra et al., 2017, 2019]. Although our sun photometer lacks the sky radiance observation, the GRASP-AOD application allows us to determine particle size distributions using only spectral AOD data [Torres et al., 2017]. In this study, the column-integrated particle size distribution was retrieved using the spectral AODs ranging from 380 to 1020 nm as the input to the GRASP algorithm. Considering Wuhan is a megacity with plenty of local aerosol emissions [Ma et al., 2019], we assumed the complex refractive index values to reflect the mixed desert-dust characteristic in particle size distribution inversion. The real part was set to be 1.55; the imaginary part was set to be wavelength-dependent (i.e. 0.003 at 380 nm, 0.0025 at 440 nm, 0.0022 at 500 nm, 0.0014 at 675 nm, 0.001 at 870 nm, and 0.001 at 1020 nm) [Dubovik et al., 2002].

## 2.3 Radiosonde Data

The radiosondes (GTS1-2, made by China) were launched twice per day at 0800 Local Time (LT) (0000 UTC) and 2000 LT (1200 UTC) from the Wuhan Weather Station, located approximately 24 km from our lidar site. The profiles of temperature and pressure provided by radiosondes were used in INP concentration parameterization [DeMott et al., 2010, 2015] to convert the aerosol particle (with radius  $>250$  nm) number concentrations ( $APC_{250}$ ) into the INP concentrations. The error for measured temperature is less than  $1^\circ\text{C}$  [Nash et al., 2011].



## 2.4 CALIOP

The Cloud-Aerosol Lidar and Infrared Pathfinder Satellite Observation (CALIPSO) satellite was launched in 2006 and carried an instrument Cloud-Aerosol Lidar with Orthogonal Polarization (CALIOP) to provide the vertical information of aerosols and clouds [Winker et al., 2007]. The satellite orbit nearly passed Wuhan every day at about 0200 LT and 1400 LT with the nearest subpoint occurred per 16 days (before 2018). It can measure the elastic backscatter at both 532 nm and 1064 nm and is also capable of measuring the depolarization ratio at 532 nm near nadir during both daytime and nighttime. The depolarization ratio is used to identify the dust aerosol and the ice-containing cloud because of their nonspherical shape. The color ratio, defined as the ratio of backscattering at 1064 nm to backscattering at 532 nm, is provided to represent the particle size. In this study, the CALIOP Level-2 vertical feature mask (VFM) product was used to validate the presence of dust layers over Wuhan [Omar et al., 2009].

## 2.5 HYSPLIT Model

The Hybrid Single Particle Lagrangian Integrated Trajectory (HYSPLIT) model, based on the National Centers for Environmental Prediction (NCEP) GDAS data product, can calculate the backward trajectory of the air mass [Draxler and Rolph, 2003]. In this study, three-day backward simulations were operated to check the potential source of the dust aerosol layers observed by polarization lidar over Wuhan.

## 3 Methodology

In this section, we introduce the retrieval schemes for dust-related particle mass and INP concentration. The specific steps of data processing were presented in the previous literature [Mamouri and Ansmann, 2014, 2015, 2016]. Here we just present the main derivation steps (Sect. 3.1). More importantly, the retrieval scheme of dust-related conversion factors over Wuhan, a megacity that is thousands of kilometers far from desert regions, is shown in detail (Sect. 3.2).

### 3.1 Retrieval scheme of dust mass concentration and dust-related INPC

First, aerosol backscatter coefficient  $\beta$  can be determined from the Mie backscatter lidar data with the Fernald Method [Fernald, 1984]. Then we need to separate the backscatter contributed by the dust component (i.e.  $\beta_d$ ) from the total aerosol backscatter coefficient  $\beta$  using the so-called ‘one-step’ approach [Mamouri and Ansmann et al., 2014]. The dust backscatter coefficient  $\beta_d$  can be converted into the dust extinction coefficient  $\alpha_d$  by multiplying the typical dust lidar ratio  $S_d$ . Finally, the  $\alpha_d$  can be related to the dust mass concentration and dust-related INPC with the conversion factors fitted by sun photometer data.



150 The primary principle is introducing two threshold values of particle depolarization ratio, non-dust particle depolarization ratio  $\delta_{nd} = 0.05$  and dust particle depolarization ratio  $\delta_d = 0.31$  [Sakai et al., 2010], to separate the respective contribution of each component (dust particle, non-dust particle, and their mixture) to the total backscatter coefficient. The particles with  $\delta_p < \delta_{nd}$  are considered as non-dust particles. The particles with  $\delta_p > \delta_d$  are considered as pure dust particles (i.e. mineral dust).  $\delta_p$  values range between  $\delta_{nd}$  and  $\delta_d$  are the mix of non-dust and pure dust components. The dust backscatter

155 coefficient  $\beta_d$  can be expressed as [Teschke et al., 2009]

$$\beta_d(z) = \beta_p(z) \frac{(\delta_p(z) - \delta_{nd})(1 + \delta_d)}{(\delta_d - \delta_{nd})(1 + \delta_p(z))}, \quad (2)$$

The subscripts ‘n’, ‘nd’, and ‘p’ represent ‘dust’, ‘non-dust’, and ‘particle’ (dust + non-dust), respectively. Therefore, the dust extinction coefficient  $\alpha_d$  can be calculated by:

$$\alpha_d(z) = \beta_d(z) \times S_d, \quad (3)$$

160 where dust lidar ratio  $S_d$  is set to be 45 sr [Hu et al., 2020]. The uncertainty for  $\alpha_d$  is on the order of 20% [Mamouri and Ansmann, 2014; Tesche et al., 2009].

Finally, the dust mass concentration  $M_d$  can be computed by the equation below:

$$M_d(z) = \rho_d \times \alpha_d(z) \times c_{v,d}, \quad (4)$$

where  $\rho_d$  is the dust particle density ( $2.6 \text{ g cm}^{-3}$  for Asian dust) [Wagner et al., 2009] and  $c_{v,d}$  is the extinction-to-volume conversion factor. The value of  $c_{v,d}$  can be obtained from sun-photometer-observed dust-intrusion days as discussed by Sect. 3.2. The uncertainty of  $M_d$  is  $\leq 60\%$  [Mamouri and Ansmann, 2014].

165

To calculate the INPC, the dust extinction coefficient  $\alpha_d$  need to be converted to the column-integrated number concentration of large particles with radius  $>250 \text{ nm}$   $APC_{250}$  (here denoted as  $n_{250,d}$ ) by the expression:

$$n_{250,d}(z) = c_{250,d} \times \alpha_d(z), \quad (5)$$

170 where  $c_{250,d}$  is the conversion factor obtained from sun photometer observation (see Sect. 3.2) during dust-intrusion days at our site. The overall uncertainty for  $n_{250,d}$  is estimated to be on the order of 30% [Mamouri and Ansmann, 2015]. Based on an INPC parameterization scheme given by DeMott et al. [2010, 2015] which is appropriate for dust-related immersion freezing regime, one can finally retrieve the height profile of INPC:

$$\text{INPC}(p_z, T_z) = [(T_0 p_z)/(T_z p_0)] \times \text{INPC}(p_0, T_0, T_z), \quad (6)$$

175 Here INPC value under standard pressure ( $p_0 = 1013 \text{ hPa}$ ) and temperature ( $T_0 = 273.16 \text{ K}$ ) condition  $\text{INPC}(p_0, T_0, T_z)$  can be expressed by D10 parameterization scheme [DeMott et al. 2010]:

$$\text{INPC}(p_0, T_0, T_z) = a \cdot (273.16 - T_z)^b \cdot n_{250,d}(p_0, T_0)^{[c(273.16 - T_z) + d]}, \quad (7)$$

where the constant  $a = 0.0000594$ ,  $b = 3.33$ ,  $c = 0.0265$ , and  $d = 0.0033$ . This parameterization scheme is applicable for temperatures ranging from  $-9^\circ \text{C}$  to  $-35^\circ \text{C}$ . D15 parameterization scheme is another option but explicitly for mineral dust,

180 which is shown as below [DeMott et al. 2015]:

$$\text{INPC}(p_0, T_0, T_z) = f_d \cdot n_{250,d}(p_0, T_0)^{[a_d(273.16 - T_z) + b_d]} \cdot \exp[c_d(273.16 - T_z) + d_d], \quad (8)$$



where the constant  $a_d = 0.074$ ,  $b_d = 3.8$ ,  $c_d = 0.414$ , and  $d_d = -9.671$ . This parameterization scheme is applicable for temperatures ranging from  $-21\text{ }^{\circ}\text{C}$  to  $-35\text{ }^{\circ}\text{C}$ . The uncertainty for INPC using the D15 is within an overall factor of 3 [Mamouri and Ansmann, 2015]. In practice, the corresponding meteorological parameter (i.e. pressure and temperature) profiles are provided by the measurement from the most recently launched radiosonde.

### 3.2 POLIPHON conversion factors over Wuhan

As mentioned in Sect. 3.1, we need to obtain the dust-related conversion factors. Ansmann et al. [2019b] reported an extended set of dust conversion factors considering all relevant deserts around the globe using the AERONET database. To obtain climatologically dust conversion factors for a given AERONET site, they filtered out all AERONET data sets with the criteria of an Ångström exponent for the 440-870 wavelength range  $AE < 0.3$  and a 532 nm (converted from 500 nm) AOD  $> 0.1$ . Considering the AERONET sites selected in Ansmann et al. [2019b] mostly located in/near the desert regions, the pure dust cases following the criteria given above can be found more easily (with adequate data sets  $> 2500$  for each site). Dust frequently intruded into Wuhan over the years; however, very few sun photometer data sets can fulfill those constraints. This is caused by plenty of local aerosol emissions (especially within the boundary layer), which make the column-integrated aerosol properties observed here generally reflect a characteristic of mixed dust (dust particles mix with other urban aerosols) [Shao et al., 2020; Liu et al., 2021]. It is also worthy to note that the previous gravitational sedimentation and wet deposition of dust particles during transport may modify the dust optical and microphysical properties in Wuhan and thus result in the dust-related conversion factors different from those near-desert sites.

To select the dust-containing data sets from sun photometer observation, for the first time, we employed the simultaneous ground-based polarization lidar observation as an auxiliary. Once a dust layer with  $\delta > 0.06$  and layer thickness  $> 0.9$  km was observed by lidar [Huang et al., 2008], we considered the simultaneous observational data sets from sun photometer available for calculating the dust-related conversion factors. For a dust-intrusion day, all these dust-containing data sets measured by sun photometer were averaged to form a representative result (AOD and later calculated particle size distribution) of this day. Here, we give an example of dust-case data-set screening scheme for a typical dust-intrusion day. Figure 2 presents the time-height contour plots of the range-corrected signal and volume depolarization ratio measured by polarization lidar during 1000-1600 LT on 28 April 2011. The lidar system began to operate at  $\sim 1000$  LT this day. Two distinct dust layers with  $\delta > 0.1$  can be identified to be located from the surface to around 2.0 km and above 2.5 km, respectively. Hence it was a typical dust-intrusion day.

The sun photometer observation results for the same day, including six-wavelength AODs, AE, FME, fine-mode and coarse-mode 500 nm AODs, are shown in Figure 3. FMFs ranged from 0.2 to 0.3 during the dust intrusion period, indicating a significant contribution of large dust particles. Similar FMF values (0.2-0.4) were also reported at Ouarzazate ( $30.9^{\circ}\text{N}$ ,  $6.9^{\circ}\text{W}$ ), Morocco during Saharan Mineral Dust Experiment 1 (SAMUM-1) [Ansmann et al., 2011; Mamouri and Ansmann, 2014]. Nevertheless, AE values were 0.6-0.9, meaning that the mixed dust cases cannot fulfill the criteria for pure dust cases ( $AE < 0.3$ ) as given by Ansmann et al. [2019b]. As confirmed by the polarization lidar observation, the sun photometer data



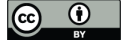

215 sets from an uninterrupted period of 1205-1550 LT were related to the dust intrusion. Therefore, the corresponding data sets measured by sun photometer during this dust-intrusion period (1205-1550 LT) were averaged to form the representative results (AOD and later particle volume size distribution) for 28 April 2011. Figure 4 shows the column-integrated particle volume size distribution (Figure 4a) and particle number size distribution (Figure 4b) derived from the averaged spectral AODs during 1205-1550 LT on 28 April 2011 based on GRASP-AOD algorithm. The particle radius ranges from 0.05 to 15  $\mu\text{m}$ .

220 The column  $\text{APC}_{250}$  values are obtained by integrating the particle number (as given in Figure 4b) with radius larger than 250 nm. Considering dust are the dominated type in coarse-mode particles, we assume  $\text{APC}_{250} = \text{APC}_{250,d}$ , where the subscript ‘d’ denotes the dust component. Then the relationship between  $\text{APC}_{250,d}$  and 500 nm AOD can be linked by a conversion factor  $c_{250,d}$  with the following equation:

$$c_{250,d} = \frac{\text{APC}_{250,d}}{\text{AOD}_{500}}, \quad (9)$$

225 Assuming an aerosol layer thickness of  $D$ , we can convert the above equation to:

$$c_{250,d} = \frac{\text{APC}_{250,d}/D}{\text{AOD}_{500}/D} = \frac{n_{250,d}}{\alpha_d}, \quad (10)$$

where  $n_{250,d}$  and  $\alpha_d$  are the layer-mean large particle (with radius  $>250$  nm) number concentration and lidar-derived dust extinction coefficient, respectively. In total, we screened 32 dust-intrusion days from the sun photometer observation during 2011-2013. As seen in Figure 5, a great correlation between  $n_{250,d}$  and  $\alpha_d$  was found with a linear Pearson correlation coefficient of 0.966 for the period of 2011-2013. Each point in Figure 5 represented a pair of daily value averaging all the dust case data sets from a typical dust-intrusion day (taking the day 28 April 2011 shown above as an example). The  $c_{250,d}$  value was  $0.11 \text{ Mm cm}^{-3}$  as computed by the equation below:

$$c_{250,d} = \frac{1}{J_d} \sum_{j=1}^{J_d} \frac{n_{250,d,j}}{\alpha_{d,j}}, \quad (11)$$

The conversion factor of  $0.11 \text{ Mm cm}^{-3}$  is approximately 27% smaller than the value of  $0.15 \text{ Mm cm}^{-3}$  obtained at Lanzhou SACOL (36.0 N, 104.1 E) AERONET site as well as at Dalanzadgad, Mongolia (see Figure 1), which are very close to the source region of Asian dust [Ansmann et al., 2019b]. This discrepancy is probably due to the partial sedimentation of dust particles with large sizes before arriving in Wuhan. Another possible reason behind this is the influence of local emissions on  $n_{250,d}$ . In consequence,  $0.11 \text{ Mm cm}^{-3}$  could be a reasonable conversion factor for mixed dust cases in a city region. Moreover, two other AERONET sites were reported to also have smaller  $c_{250,d}$  value as Wuhan, i.e. White Sands site ( $0.10 \text{ Mm cm}^{-3}$ ) in North America and Birdsville site ( $0.11 \text{ Mm cm}^{-3}$ ) in central Australia [Ansmann et al., 2019b].

240 The column particle volume concentration value  $V_d$  are obtained by integrating the entire particle size distribution spectrum. The relationship between  $V_d$  and 500 nm AOD can be linked by a so-called extinction-to-volume conversion factor  $c_{v,d}$  with the following equation:

$$c_{v,d} = \frac{V_d}{\text{AOD}_{500}}, \quad (12)$$

245 Assuming an aerosol layer thickness of  $D$ , we can convert the above equation to:



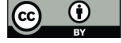

$$c_{v,d} = \frac{V_d/D}{AOD_{500}/D} = \frac{v_d}{\alpha_d}, \quad (13)$$

where  $v_d$  and  $\alpha_d$  are the layer-mean particle volume concentration and extinction coefficient, respectively. As seen in Figure 6, a correlation between  $v_d$  and  $\alpha_d$  was found with a linear Pearson correlation coefficient of 0.653 for the period of 2011-2013. Each point in Figure 6 also represented a pair of daily value averaging all the dust-case data sets from a typical dust-intrusion day (taking the day 28 April 2011 shown above as an example). The  $c_{v,d}$  value was  $0.52 \times 10^{-12} \text{ Mm m}^3 \text{ m}^{-3}$  as computed by the equation below:

$$c_{v,d} = \frac{1}{J_d} \sum_{j=1}^{J_d} \frac{v_{d,j}}{\alpha_{d,j}}, \quad (14)$$

The conversion factor  $c_{v,d}$  of  $0.52 \times 10^{-12} \text{ Mm m}^3 \text{ m}^{-3}$  is approximately 32% smaller than the value of  $0.77 \times 10^{-12} \text{ Mm m}^3 \text{ m}^{-3}$  obtained at Lanzhou SACOL AERONET site [Ansmann et al., 2019b], suggesting that the proportion of dust particles in the atmospheric column is relatively smaller in Wuhan. In particular, those more dispersed points below the dashed line seem to be more affected by anthropogenic aerosols.

#### 4 Case Study on a Dust-related Heterogeneous Nucleation Process

We used the two dust-related conversion factors  $c_{250,d}$  and  $c_{v,d}$  retrieved at Wuhan to analyze a dust-related heterogeneous nucleation case on 31 December 2017. Figure 7 presents the time-height contour plots (1 minute/30 m resolution) of the range-corrected signal (Figure 7b) and volume depolarization ratio  $\delta$  during 0100-0700 LT (Figure 7d). The corresponding profiles of the relative humidity (RH), temperature (T), horizontal wind speed (V), and wind direction from the radiosonde launched at 0800LT are shown in Figure 7a and 7c. Two distinct dust aerosol layers (below ~2 km and at ~4.5-6.5 km, respectively) were identified with peak  $\delta$  values exceeding 0.1. Another slight dust layer with an enhanced  $\delta$  of ~0.04 occurred up to ~8 km.

According to the backward trajectories in Figure 8, the dust layer below 2 km probably originated from the Taklimakan Desert. The two aloft dust layers were probably linked to the desert regions over northwest India and Pakistan. As seen from Figure 9, the occurrence of dust over Wuhan was also verified by the aerosol subtype classification provided by the CALIOP Level-2 VFM data product. The satellite passed over Wuhan at ~1850 UTC on 30 December 2017 (0250 LT on 31 December 2017). The two aerosol layers around Wuhan, respectively located at 0-2 km and ~4-5.5 km, were distinguished as the mix of dust (marked as '2', in yellow) and polluted dust (marked as '5', in brown).

As seen in Figure 7d, an ice-containing cloud appeared at ~0405 LT at the altitudes where the upmost slight dust layer was located. The temperature at around 8 km was  $-32.5^\circ \text{C}$  as denoted by the horizontal dashed lines in Figure 7. Therefore, the dust particles were likely to trigger the heterogeneous ice formation. Figure 10 shows the height profiles of optical properties including dust and total extinction coefficient, dust and total backscatter coefficient, volume depolarization ratio, and particle depolarization ratio during the period of 0320-0350 LT. The peak dust extinction coefficient for the upmost dust layer at an altitude of ~8.1 km was  $2.0 \text{ Mm}^{-1}$ . The peak particle depolarization ratio  $\delta_p$  value for this slight dust layer was 0.16. The  $\delta_p$



values of  $<0.3$  were observed throughout the altitudes of 4–9 km, indicating the possible presence of mixed dust or fine-mode dust [Sakai et al., 2010].

In Figure 11a, the dust extinction coefficients were converted into the dust mass concentrations by multiplying by the extinction-to-volume conversion factor  $c_{v,d}$  and dust density. The maximum dust mass concentrations were  $2.6 \mu\text{g m}^{-3}$  for the dust layer around 8 km and  $46.0 \mu\text{g m}^{-3}$  for the dust layer at altitudes of 4.4–5.3 km. Note that more dense dust plumes could even be observed frequently in Wuhan. The dust mass concentrations of  $6.27\text{--}154.79 \mu\text{g m}^{-3}$  had been observed in Wuhan for the dust events from December 2012 to December 2013 [He et al., 2021a]. In Figure 11b, the dust extinction coefficients were converted into the large particle number concentrations  $\text{APC}_{250}$  by multiplying by the conversion factor  $c_{250,d}$ . Applying the INPC parameterization scheme D10 [DeMott et al., 2010] and D15 [DeMott et al., 2015], the ice-nucleating particle concentrations were finally retrieved as seen in Figure 11c. The peak INPC value for the slight dust layer at an altitude of 8.1 km was  $2.0 \text{ L}^{-1}$  for D15 and  $1.66 \text{ L}^{-1}$ , indicating two parameterization schemes are in good agreement at low temperatures even for an aloft layer containing only a small quantity of dust particles. These dust-related INPs might be related to the later-formed ice particles within the cloud at the same altitudes. It should be mentioned that, for deposition nucleation, another INPC parameterization scheme U17-D should be utilized (not shown herein) [Ullrich et al., 2017]. Near the desert region, Jiang et al. [2016] found the INP concentrations can reach a level of several hundred per liter at  $-22^\circ\text{C}$  during a dust event in Xinjiang, northwest of China. For the downstream region of transported Asian dust, Chen et al. [2021] reported similar INP concentrations at  $-16^\circ\text{C}$  for 13 dust events in Beijing range from  $0.42$  to  $17.36 \text{ L}^{-1}$ . As more dense dust plumes were reported to appear frequently in Wuhan [He et al., 2021a], the INPC values much larger than  $2.0 \text{ L}^{-1}$  as observed in this case are probably present at other times, especially in the winter when the zero isotherms can drop to a lower height. This INPC level can have an important effect on ice nucleation in the atmosphere.

## 5 Discussions and Conclusions

The quantitative evaluation of dust-related INPC profiles is of particular interest for understanding the specific contribution of heterogeneous nucleation to the aerosol-cloud-interaction-induced radiative forcing. Furthermore, the understanding of INPC is also indispensable for estimating the impact of dust-related INPs on extreme precipitation [Zhang et al., 2020]. However, when using the POLIPHON method to estimate the dust-related INPC profiles, the calibration of dust-related conversion factors is not easy, but of great importance, for those cities over the downstream regions of long-range transported dust plumes. They may suffer the dual impact of the emissions of local pollutions and transported dust aerosols. Urban air pollutions (e.g. anthropogenic  $\text{PM}_{2.5}$  and black carbon) are generally considered not to affect the atmospheric INPC [Chen et al., 2018], thus the extraction of dust-related INP concentration using the powerful POLIPHON method is possible. In addition, the dust sedimentation and particle microphysical properties modification may also take place during the transport and thus lead to the modified conversion factors over downstream cities compared with those over near-desert areas.



In this study, the retrievals of INPC and dust concentration ~~mass~~-profiles were realized for a central China megacity Wuhan (30.5°N, 114.4°E), located at the downstream region of long-range transported dust (see Figure 1). Different from the previous screening scheme of dust occurrence data sets that simply employs the AOD at 532 nm >0.1 and Ångström exponent for the 440–870 nm wavelength range <0.3 [Ansmann et al., 2019b] as the indicators of dust occurrence, ground-based polarization lidar observation was used as a useful auxiliary to verify whether dust particles were involved in a data set measured by sun photometer. In consequence, the dust-related conversion factors explicit for Wuhan (usually mixed dust) were obtained for the first time. The extinction-to-volume conversion factor  $c_{v,d} = 0.52 \times 10^{-12} \text{ Mm m}^3 \text{ m}^{-3}$  and the extinction-to-large particle (with radius >250 nm) number concentration conversion factor  $c_{250,d} = 0.11 \text{ Mm cm}^{-3}$ . They were both smaller than those observed at Lanzhou SACOL (36.0°N, 104.1°E) AERONET site that is much more closed to the source region of Asian dust. The discrepancies are probably due to the partial sedimentation of dust particles during their several thousands of kilometers transport before arriving at Wuhan. This dust-case data-set screening scheme may potentially be extended to the other polluted city sites more influenced by mixed dust.

A case study on the dust-related heterogeneous nucleation process was presented. Applying the conversion factors obtained herein together with the parameterization scheme D10 and D15, the height profile of INPC and dust mass concentration before the presence of an ice-containing cloud was shown. The maximum dust mass concentration at an altitude of 8.1 km is only  $2.6 \mu\text{g m}^{-3}$ ; the corresponding INPC here reached  $2.0 \text{ L}^{-1}$  and was seemed to trigger the subsequent heterogeneous ice formation.

In the future, the conversion parameters obtained in this study will be used to study the seasonal and long-term variation of INPC vertical distributions over Wuhan [Tobo et al., 2020]. We will also need to separate other different aerosol components and retrieve their corresponding POLIPHON conversion factors [Mamouri and Ansmann, 2017; Córdoba-Jabonero et al., 2018]. Furthermore, the observations with millimeter-wave radar can give the ice crystal number concentration information within the cloud so that may realize the possible closure study of heterogeneous ice nucleation process [Ansmann et al., 2019a]. Additionally, the retrieved dust mass concentration profiles are ~~anticipated~~ to verify the results ~~outputted~~ from dust models such as NMME-DREAM [Konsta et al., 2021].

## Data availability

Sun photometer and ground-based polarization lidar data used to generate the results of this paper are available at the website (doi:10.5281/zenodo.4683015). CALIPSO data used in this work can be accessed through the website <https://subset.larc.nasa.gov>. Wuhan radiosonde data can be obtained at the website <http://weather.uwyo.edu/upperair/sounding.html>. MODIS land cover type data product is available at the website <https://ladsweb.modaps.eosdis.nasa.gov>. HYSPLIT model can be run through the website [https://ready.arl.noaa.gov/HYSPLIT\\_traj.php](https://ready.arl.noaa.gov/HYSPLIT_traj.php).



## 340 Author Contributions

Yun He conceived the research, analyzed the data, acquired the research funding, and wrote the manuscript. Yunfei Zhang analyzed the sun photometer data. Fuchao Liu reviewed and proofread the manuscript. Zhenping Yin and Yang Yi participated in the scientific discussions, reviewed and proofread the manuscript. Yifan Zhan spent efforts in running the GRASP-AOD algorithm. Fan Yi acquired the research funding and led the study.

## 345 Competing interests

The authors declare that they have no conflict of interest.

## Acknowledgments

This work is supported by the National Natural Science Foundation of China [grant numbers 41927804, 42005101]; the Hubei Provincial Natural Science Foundation of China [grant number 2020CFB229]; the Fundamental Research Funds for the Central Universities [grant number 2042020kf0018]; and the Meridian Space Weather Monitoring Project (China). The authors thank the University of Wyoming for providing the Wuhan radiosonde data, the Atmospheric Science Data Central (ASDC) at the NASA Langley Research Center for providing the CALIPSO data, the Level 1 and Atmosphere Archive and Distribution System (LAADS) Distributed Active Archive Center (DAAC) at the NASA Goddard Space Flight Center Center for providing the MODIS land cover type data product, and the NOAA Air Resources Laboratory (ARL) for the HYSPLIT model. The authors also would like to acknowledge the use of GRASP inversion algorithm software (http://www.grasp-open.com) in this work. Finally, we thank the colleagues who participated in the operation of the lidar system at our site.

## References

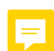

- Ansmann, A., Petzold, A., Kandler, K., Tegen, I., Wendisch, M., Müller, D., Weinzierl, B., Müller, T., and Heintzenberg, J.: Saharan mineral dust experiments SAMUM-1 and SAMUM-2: What have we learned? *Tellus B*, 63, 403-429. doi:10.1111/j.1600-0889.2011.00555.x, 2011.
- Ansmann, A., Seifert, P., Tesche, M., and Wandinger, U.: Profiling of fine and coarse particle mass: case studies of Saharan dust and Eyjafjallajökull/Grimsvötn volcanic plumes, *Atmospheric Chemistry and Physics*, 12, 9399-9415. doi.org/10.5194/acp-12-9399-2012, 2012.
- Ansmann, A., Mamouri, R.-E., Bühl, J., Seifert, P., Engelmann, R., Hofer, J., Nisantzi, A., Atkinson, J. D., Kanji, Z. A., Sierau, B., Vrekoussis, M., and Sciare, J.: Ice-nucleating particle versus ice crystal number concentration in altocumulus and



- cirrus embedded in Saharan dust: A closure study, *Atmospheric Chemistry and Physics*, 19, 15087-15115. doi.org/10.5194/acp-19-15087-2019, 2019a.
- Ansmann, A., Mamouri, R.-E., Hofer, J., Baars, H., Althausen, D., and Abdullaev, S. F.: Dust mass, cloud condensation nuclei, and ice-nucleating particle profiling with polarization lidar: updated POLIPHON conversion factors from global AERONET analysis, *Atmospheric Measurement Techniques*, 12, 4849-4865. doi.org/10.5194/amt-12-4849-2019, 2019b.
- Ansmann, A., Ohneiser, K., Mamouri, R.-E., Knopf, D., Veselovskii, I., Baars, H., Engelmann, R. Foth, A., Jimenez, C., Seifert, P., and Barja, B.: Tropospheric and stratospheric wildfire smoke profiling with lidar: Mass, surface area, CCN and INP retrieval, *Atmospheric Chemistry and Physics Discussions*. doi.org/10.5194/acp-2020-1093, 2020.
- Behrendt, A., and Nakamura, T.: Calculation of the calibration constant of polarization lidar and its dependency on atmospheric temperature, *Optics Express*, 10(16), 805-817. doi.org/10.1364/OE.10.000805, 2002.
- Benavent-Oltra, J., Román, R., Granados-Muñoz, M., Pérez-Ramírez, D., Ortiz-Amezcuca, P., Denjean, C., Lopatin, A., Lyamani, H., Torres, B., Guerrero-Rascado, J., Fuertes, D., Dubovik, O., Chaikovsky, A., Olmo, F., Mallet, M., and Alados-Arboledas, L.: Comparative assessment of GRASP algorithm for a dust event over Granada (Spain) during ChArMEx-ADRI-MED 2013 campaign, *Atmospheric Measurement Technique*, 10, 4439-4457. doi.org/10.5194/amt-10-4439-2017, 2017.
- Benavent-Oltra, J., Román, R., Casquero-Vera, J., Pérez-Ramírez, D., Lyamani, H., Ortiz-Amezcuca, P., Bedoya-Velázquez, A., de Arruda Moreira, G., Barreto, Á., Lopatin, A., Fuertes, D., Herrera, M., Torres, B., Dubovik, O., Guerrero-Rascado, J., Goloub, P., Olmo-Reyes, F., and Alados-Arboledas, L.: Different strategies to retrieve aerosol properties at night-time with the GRASP algorithm, *Atmospheric Chemistry and Physics*, 19, 14149-14171. doi.org/10.5194/acp-19-14149-2019, 2019.
- Cantrell, W. and Heymsfield, A.: Production of ice in tropospheric clouds, *Bulletin of the American Meteorological Society*, 86, 795-807. doi.org/10.1175/BAMS-86-6-795, 2005.
- Chen, J., Wu, Z., Augustin-Bauditz, S., Grawe, S., Hartmann, M., Pei, X., Liu, Z., Ji, D., and Wex, H.: Ice-nucleating particle concentrations unaffected by urban air pollution in Beijing, China, *Atmospheric Chemistry and Physics*, 18, 3523-3539. doi.org/10.5194/acp-18-3523-2018, 2018.
- Chen, J., Wu, Z., Chen, J., Reicher, N., Fang, X., Rudich, Y., and Hu, M.: Size-resolved atmospheric ice-nucleating particles during East Asian dust events, *Atmospheric Chemistry and Physics*, 21, 3491-3506. doi.org/10.5194/acp-21-3491-2021, 2021.
- Córdoba-Jabonero, C., Sicard, M., Ansmann, A., del ~~Águila~~ <sup>Águila</sup>, A., and Baars, H.: Separation of the optical and mass features of particle components in different aerosol mixtures by using POLIPHON retrievals in synergy with continuous polarized Micro-Pulse Lidar (P-MPL) measurements, *Atmospheric Measurement Techniques*, 11, 4775-4795. doi.org/10.5194/amt-11-4775-2018, 2018.
- DeMott, P., Prenni, A., Liu, X., Kreidenweis, S., Petters, M., Twohy, C., Richardson, M., Eidhammer, T., and Rogers, D.: Predicting global atmospheric ice nuclei distributions and their impacts on climate, *Proceedings of the National Academy of Sciences of the USA*, 107, 11217-11222. doi:10.1073/pnas.0910818107, 2010.



- DeMott, P., Prenni, A., McMeeking, G., Sullivan, R., Petters, M., Tobo, Y., Niemand, M., Möhler, O., Snider, J., Wang, Z., and Kreidenweis, S.: Integrating laboratory and field data to quantify the immersion freezing ice nucleation activity of mineral dust particles, *Atmospheric Chemistry and Physics*, 15, 393-409. doi:10.5194/acp-15-393-2015, 2015.
- Draxler, R., and Rolph, G.: HYSPLIT (Hybrid Single-Particle Lagrangian Integrated Trajectory) Model, Air Resources Laboratory, NOAA, Silver Spring, Md, USA, 2003. <http://www.arl.noaa.gov/ready/hysplit4.html>. 
- 405 Dubovik, O., Holben, B., Eck, T., Smirnov, A., Kaufman, Y., King, M., Tanré and Slutsker, I.: Variability of absorption and optical properties of key aerosol types observed in worldwide locations, *Journal of the Atmospheric Science*, 59(3), 590-608. doi:10.1175/1520-0469(2002)059<0590:VOAAOP>2.0.CO;2, 2002.
- Dubovik, O., Lapyonok, T., Litvinov, P., Herman, M., Fuertes, D., Ducos, F., Lopatin, A., Chaikovsky, A., Torres, B., Derimian, Y., Huang, X., Aspörsberger, M., and Federspiel, C.: GRASP: A versatile algorithm for characterizing the atmosphere, *SPIE Newsroom*. doi.org/10.1117/2.1201408.005558, 2014.
- 410 Fernald, F. G.: Analysis of atmospheric lidar observations: some comments, *Applied Optics*, 23, 652-653. doi:10.1364/AO.23.000652, 1984.
- Freudenthaler, V., Esselborn, M., Wiegner, M., Heese, B., Tesche, M., Ansmann, A., Müller, D., Althausen, D., Wirth, M., Fix, A., Ehret, G., Knippertz, P., Toledano, C., Gasteiger, J., Garhammer, M., and Seefeldner, M.: Depolarization ratio profiling at several wavelengths in pure Saharan dust during SAMUM2006, *Tellus B*, 61(1), 165-179. doi:10.1111/j.1600-0889.2008.00396.x, 2009.
- Friedl, Mark, Damien Sulla-Menashe - Boston University and MODAPS SIPS - NASA.: MCD12C1 MODIS/Terra+Aqua Land Cover Type Yearly L3 Global 0.05Deg CMG. NASA LP DAAC, 2015. <http://doi.org/10.5067/MODIS/MCD12C1.006>.
- 420 Hallett, J., and Mossop, S.: Production of secondary ice particles during the riming process, *Nature*, 249, 26-28. doi.org/10.1038/249026a0, 1974.
- He, Y., and Yi, F.: Dust aerosols detected using a ground-based polarization lidar and CALIPSO over Wuhan (30.5N, 114.4E), China, *Advance in Meteorology*, Article ID 536762. doi.org/10.1155/2015/536762, 2015.
- He, Y., Yi, F., Yi, Y., Liu, F., and Zhang, Y.: Heterogeneous nucleation of midlevel cloud layer influenced by transported Asian dust over Wuhan (30.5 °N, 114.4 °E), China, *Journal of Geophysical Research: Atmospheres*, 126(2), e2020JD033394. doi.org/10.1029/2020JD033394, 2021a.
- 425 He, Y., Liu, F., Yin, Z., Zhang, Y., Zhan, Y., and Yi, F.: Horizontally Oriented ice crystals observed by the synergy of zenith- and slant-pointed polarization lidar over Wuhan (30.5 °N, 114.4 °E), China, *Journal of Quantitative Spectroscopy and Radiative Transfer*, in Press. doi.org/10.1016/j.jqsrt.2021.107626, 2021b.
- 430 Hofer, J., Ansmann, A., Althausen, D., Engelmann, R., Baars, H., Abdullaev, S., and Makhmudov, A.: Long-term profiling of aerosol light extinction, particle mass, cloud condensation nuclei, and ice-nucleating particle concentration over Dushanbe, Tajikistan, in Central Asia, *Atmospheric Chemistry and Physics*, 20, 4695-4711. doi.org/10.5194/acp-20-4695-2020, 2020.





- Holben, B., Eck, T., Slutsker, I., Tanré D., Buis, J., Setzer, A., Vermote, E., Reagan, J., Kaufman, Y., Nakajima, T., Lavenu, F., Jankowiak, I., and Smirnov, A.: AERONET—A federated instrument network and data archive for aerosol  
 435 characterization, *Remote Sensing of Environment*, 66(1), 1-16. doi.org/10.1016/s0034-4257(98)00031-5, 1998.
- Hoose, C., Kristjánsson, J., Chen, J.-P., and Hazra, A.: A classical-theory-based parameterization of heterogeneous ice nucleation by mineral dust, soot, and biological particles in a global climate model, *Journal of the Atmospheric Science*, 67(8), 2483-2503. doi.org/10.1175/2010JAS3425.1, 2010.
- Hu, Q., Wang, H., Goloub, P., Li, Z., Veselovskii, I., Podvin, T., Li, K., and Korenskiy, M.: The characterization of  
 440 Taklamakan dust properties using a multiwavelength Raman polarization lidar in Kashi, China, *Atmospheric Chemistry and Physics*, 20, 13817-13834. doi.org/10.5194/acp-20-13817-2020, 2020.
- Huang, J., Minnis, P., Chen, B., Huang, Z., Liu, Z., Zhao, Q., Yi, Y., and Ayers, J.: Long-range transport and vertical structure of Asian dust from CALIPSO and surface measurements during PACDEX, *Journal of Geophysical Research: Atmospheres*, 113, 23, D23212. doi.org/10.1029/2008JD010620, 2008.
- 445 IPCC. 2013: Climate change: The physical science basis. In Contribution of Working Group I to the Fifth Assessment Report of the Intergovernmental Panel on Climate Change, Cambridge University Press 
- Jiang, H., Yin, Y., Wang, X., Gao, R., Yuan, L., Chen, K., and Shan, Y.: The measurement and parameterization of ice nucleating particles in different backgrounds of China, *Atmospheric Research*, 181, 72-80. dx.doi.org/10.1016/j.atmosres.2016.06.013, 2016.
- 450 Kanji, Z. A., Ladino, L. A., Wex, H., Boose, Y., Burkert-Kohn, M., Cziczo, D. J., and Krämer, M.: Overview of ice nucleating particles, *Meteorological Monographs*, 58, 1.1-1.33. doi:10.1175/AMSMONOGRAPHS-D-16-0006.1, 2017.
- Kong, W., and Yi, F.: Convective border layer evolution from lidar backscatter and its relationship with surface aerosol concentration at a location of a central China megacity, *Journal of Geophysics Research: Atmospheres*, 120, 7928-7940. doi:10.1002/2015JD023248, 2015.
- 455 Konsta, D., Tsekeri, A., Solomos, S., Siomos, N., Gialitaki, A., Tetoni, E., Lopatin, A., Goloub, P., Dubovik, O., Amiridis, V., and Nastos, P.: The potential of GRASP/GARRLiC retrievals for dust aerosol model evaluation: case study during the PreTECT Campaign, *Remote Sensing*, 13(5), 873. doi.org/10.3390/rs13050873, 2021.
- Liu, F., Yi, F., Yin, Z., Zhang Y., He, Y., and Yi, Y.: Measurement report: characteristics of clear-day convective boundary layer and associated entrainment zone as observed by a ground-based polarization lidar over Wuhan (30.5°N, 114.4°E),  
 460 *Atmospheric Chemistry and Physics*, 21, 2981-2998. doi.org/10.5194/acp-21-2981-2021, 2021.
- Ma, Y., Zhang, M., Jin, S., Gong, W., Chen, N., Chen, Z., Jin, Y., and Shi, Y.: Long-term investigation of aerosol optical and radiative characteristics in a typical megacity of central China during winter haze periods, *Journal of Geophysical Research: Atmospheres*, 124, 12093-12106. doi.org/10.1029/2019JD030840, 2019.
- Mamali, D., Marinou, E., Sciare, J., Pikridas, M., Kokkalis, P., Kottas, M., Binietoglou, I., Tsekeri, A., Keleshis, C.,  
 465 Engelmann, R., Baars, H., Ansmann, A., Amiridis, V., Russchenberg, H., and Biskos, G.: Vertical profiles of aerosol mass





- concentration derived by unmanned airborne in situ and remote sensing instruments during dust events, *Atmospheric Measurement Techniques*, 11, 2897–2910. doi.org/10.5194/amt-11-2897-2018, 2018.
- Mamouri, R. E., Ansmann, A., Nisantzi, A., Kokkalis, P., Schwarz, A., and Hadjimitsis, D.: Low Arabian extinction-to-backscatter ratio, *Geophysical Research Letters*, 40, 4762–4766. doi:10.1002/grl.50898, 2013.
- 470 Mamouri, R. E. and Ansmann, A.: Fine and Coarse dust separation with polarization lidar, *Atmospheric Measurement Techniques*, 7, 3717–3735. doi:10.5194/amt-7-3717-2014, 2014.
- Mamouri, R. E. and Ansmann, A.: Estimated desert-dust ice nuclei profiles from polarization lidar: methodology and case studies, *Atmospheric Chemistry and Physics*, 15, 3463–3477. doi.org/10.5194/acp-15-3463-2015, 2015.
- Mamouri, R. E. and Ansmann, A.: Potential of polarization lidar to provide profiles of CCN- and INP-relevant aerosol  
 475 parameters, *Atmospheric Chemistry and Physics*, 16, 5905–5931. doi:10.5194/acp-16-5905-2016, 2016.
- Mamouri, R. E. and Ansmann, A.: Potential of polarization/Raman lidar to separate fine dust, coarse dust, maritime, and anthropogenic aerosol profiles, *Atmospheric Measurement Techniques*, 10, 3403–3427. doi.org/10.5194/amt-10-3403-2017, 2017.
- Marinou, R. E., Tesche, M., Nenes, A., Ansmann, A., Schrod, J., Mamali, D., Tsekeri, A., Pikridas, M., Baars, H.,  
 480 Engelmann, R., Voudouri, K.-A., Solomos, S., Sciare, J., Groß, S., Ewald, F., and Amiridis, V.: Retrieval of ice-nucleating particle concentrations from lidar observations and comparison with UAV in situ measurements, *Atmospheric Chemistry and Physics*, 19, 11315–11342. doi.org/10.5194/acp-19-11315-2019, 2019.
- Murray, B. J., O’Sullivan, D., Atkinson, J. D., and Webb, M. E.: Ice nucleation by particles immersed in supercooled cloud droplet, *Chemical Society Reviews*, 41, 6519–6554. doi:10.1039/c2cs35200a, 2012.
- 485 Mülmenstädt, J., Sourdeval, O., Delanoë, J., and Quaas, J.: Frequency of occurrence of rain from liquid-, mixed-, and ice-phase clouds derived from A-Train satellite retrievals, *Geophysical Research Letters*, 42, 6502–6509. doi.org/10.1002/2015GL06460, 2015.
- Nash, J., Oakley, T., Vömel, H., and Li, W.: WMO intercomparison of high quality radiosonde systems, Yangjiang, China, vol. 107, p. 238, World Meteorological Organization, Instruments and Observing methods, Geneva, Switzerland, 2011. 
- 490 Omar, A. H., Winker, D. M., Kittaka, C., Vaughan, M. A., Liu, Z., Hu, Y., Rogers, R. R., Ferrare, R. A., Lee, K.-P., Kuehn, R. E., and Hostetler, C. A.: The CALIPSO Automated Aerosol Classification and Lidar Ratio Selection Algorithm, *Journal of Atmospheric and Oceanic Technology*, 26(10), 1994–2014. doi.org/10.1175/2009JTECHA1231.1, 2009.
- O’Neill, N., Eck, T., Smirnov, A., Holben, B., and Thulasiraman, S.: Spectral discrimination of coarse and fine mode optical depth, *Journal of Geophysical Research*, 108(D17), 4559. doi:10.1029/2002jd002975, 2003.
- 495 Rosenfeld, D., Lohmann, U., Raga, G. B., O’Dowd, C. D., Kulmala, M., Fuzzi, S., Reissell, A., and Andreae, M. O.: Flood or drought: How do aerosols affect precipitation? *Science*, 321, 1309–1313. doi:10.1126/science.1160606, 2008.
- Rosenfeld, D., Andreae, M. O., Asmi, A., Chin, M., Leeuw, G., Donovan, D. P., Kahn, R., Kinne, S., Kivekäs, N., Kulmala, M., Lau, W., Schmidt, K. S., Suni, T., Wagner, T., Wild, M., and Quaas, J.: Global observations of aerosol-cloud-precipitation-climate interactions, *Reviews of Geophysics*, 52, 750–808. doi:10.1002/2013RG000441, 2014.



- 500 Sakai, T., Nagai, T., Zaizen, Y., and Mano, Y.: Backscattering linear depolarization ratio measurements of mineral, sea-salt, and ammonium sulfate particles simulated in a laboratory chamber. *Applied Optics*, 49, 4441-4449. doi.org/10.1364/AO.49.004441, 2010.
- Shao, J., Yi, F., and Yin, Z.: Aerosol layers in the free troposphere and their seasonal variations as observed in Wuhan, China, *Atmospheric Environment*, 224, 117323. doi.org/10.1016/j.atmosenv.2020.117323, 2020.
- 505 Tesche, M., Ansmann, A., Müller, D., Althausen, D., Engelmann, R., Freudenthaler, V., and Groß, S.: Vertically resolved separation of dust and smoke over Cape Verde using multiwavelength Raman and polarization lidars during Saharan Mineral Dust Experiment 2008, *Journal of Geophysical Research*, 114, D13202. doi:10.1029/2009JD011862, 2009.
- Tobo, Y., Uetake, J., Matsui, H., Moteki, N., Uji, Y., Iwamoto, Y., Miura, K., and Misumi, R.: Seasonal trends of atmospheric ice nucleating particles over Tokyo, *Journal of Geophysical Research: Atmospheres*, 125, e2020JD033658. doi.org/10.1029/2020JD033658, 2020.
- 510 Torres, B., Dubovik, O., Fuertes, D., Schuster, G., Cachorro, V. E., Lapyonok, T., Goloub, P., Blarel, L., Barreto, A., Mallet, M., Toledano, C., and Tanré, D.: Advanced characterisation of aerosol size properties from measurements of spectral optical depth using the GRASP algorithm, *Atmospheric Measurement Techniques*, 10, 3743-3781. doi.org/10.5194/amt-10-3743-2017, 2017.
- 515 Ullrich, R., Hoose, C., Möhler, O., Niemand, M., Wagner, R., Höhler, K., Hiranuma, N., Saathoff, H., and Leisner, T.: A new ice nucleation active site parameterization for desert dust and soot, *Journal of the Atmospheric Science*, 74, 699-717. doi.org/10.1175/JASD-16-0074.1, 2017.
- Wagner, F., Bortoli, D., Pereira, S., Costa, M. J., Silva, A. M., Weinzierl, B., Esselborn, M., Petzold, A., Rasp, K., Heinold B., and Tegen, I.: Properties of dust aerosol particles transported to Portugal from the Sahara desert, *Tellus B: Chemical and Physical Meteorology*, 61(1), 297-306. doi.org/10.1111/j.1600-0889.2008.00393.x, 2009.
- 520 Winker, D., Hunt, W., and McGill, M.: Initial performance assessment of CALIOP, *Geophysical Research Letters*, 34(19), L19803. doi.org/10.1029/2007GL030135, 2007.
- Yin, Z., Yi, F., He, Y., Liu, D., Yu, C., and Zhang, Y.: Asian dust impacts on heterogeneous ice formation at Wuhan based on polarization lidar measurements, *Atmospheric Environment*, 246(11), 118166. doi: 10.1016/j.atmosenv.2020.118166, 2021.
- 525 Zhang, Y., Yi, F., Kong, W., and Yi, Y.: Slope characterization in combining analog and photon count data from atmospheric lidar measurements, *Applied Optics*, 53(31), 7312-7320. doi.org/10.1364/AO.53.007312, 2014.
- Zhang, Y., Yu, F., Luo, G., Chen, J.-P., and Chou, C.: Impact of mineral dust on summertime precipitation over the Taiwan region, *Journal of Geophysical Research: Atmospheres*, 125, e2020JD033120. doi.org/10.1029/2020JD033120, 2020.
- 530 Zhang, Y., Zhang, Y., Yu, C., and Yi, F.: Evolution of aerosols in the atmospheric boundary layer and elevated layers during a severe, persistent haze episode in a central China megacity, *Atmosphere*, 12, 152. doi.org/10.3390/atmos12020152, 2021.

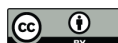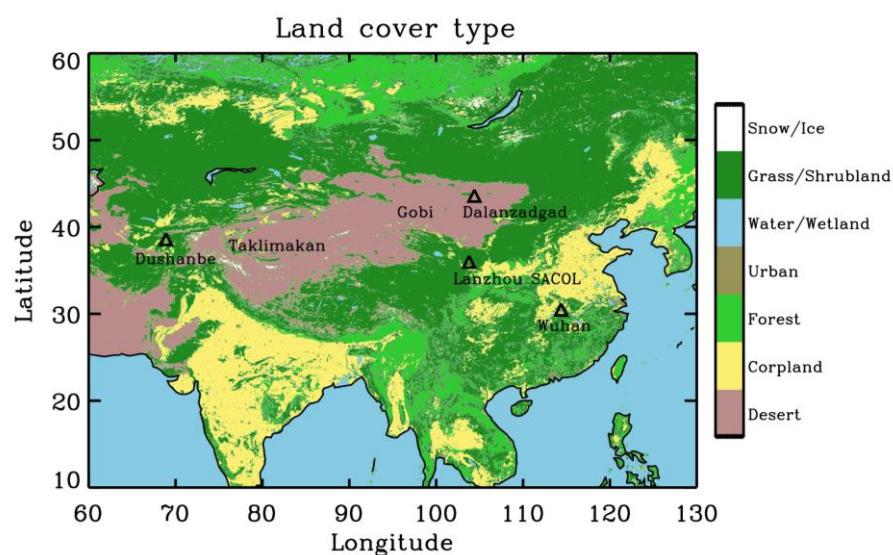

535 **Figure 1: The land cover type during January 2019 – February 2020 over Eastern Asia region (60-130 °E, 10-60 °N) obtained from the MODIS (combined Aqua and Terra) Collection 6 level-3 MCD12C1 product (with 0.05 ° resolution). The locations of three AERONET sites Dushanbe (38.6 °N, 68.8 °E), Dalanzadgad (43.6 °N, 104.4 °E), and Lanzhou SACOL (36.0 °N, 104.1 °E) as well as the central China city Wuhan (30.5 °N, 114.4 °E) are marked with the hollow black triangles. The general locations of the Gobi Desert and Taklimakan Desert are also marked as seen in the brown areas [Friedl et al., 2015].**

540

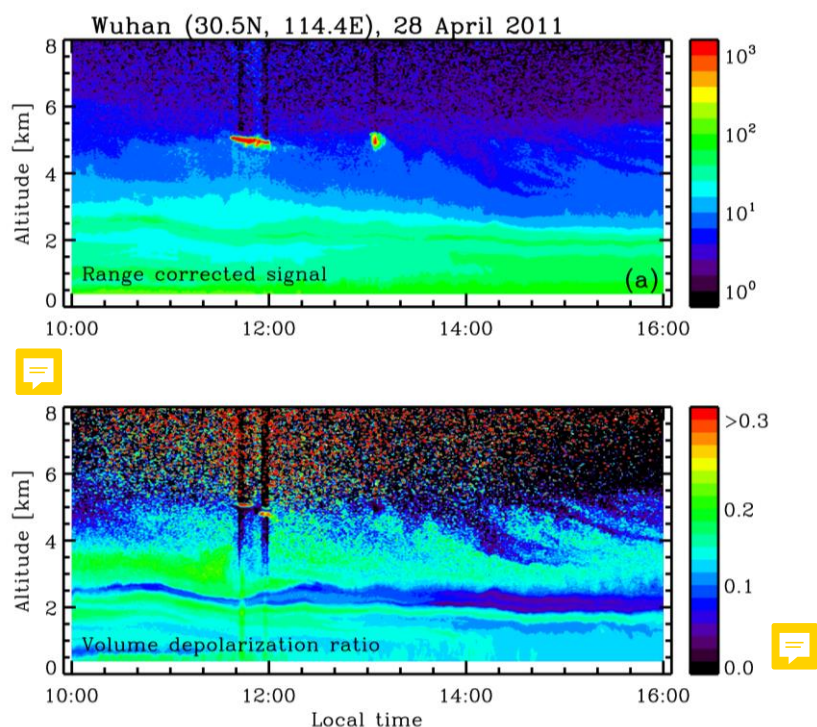

**Figure 2:** Time-height contour plots (1minute/30m resolution) of (a) range-corrected signal and (b) volume depolarization ratio measured by a 532 nm polarization lidar on 28 April 2011.

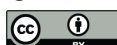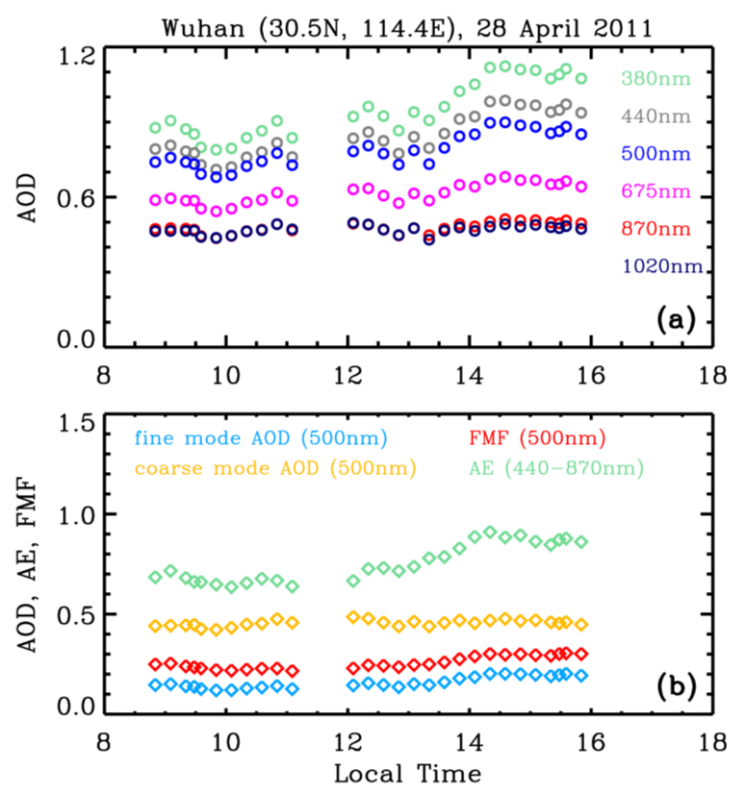

Figure 3: Time series of (a) AOD at six wavelengths (380 nm, 440 nm, 500 nm, 675 nm, 870 nm, 1020 nm) and (b) 500 nm fine mode AOD (azure rhombi), coarse mode AOD (yellow rhombi), fine-mode AOD fraction (FMF, red rhombi), and Ångström exponent for the 440–870 nm wavelength range (AE, aquamarine rhombi) observed with sun photometer at Wuhan (30.5° N, 114.4° E) on 28 April 2011.

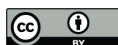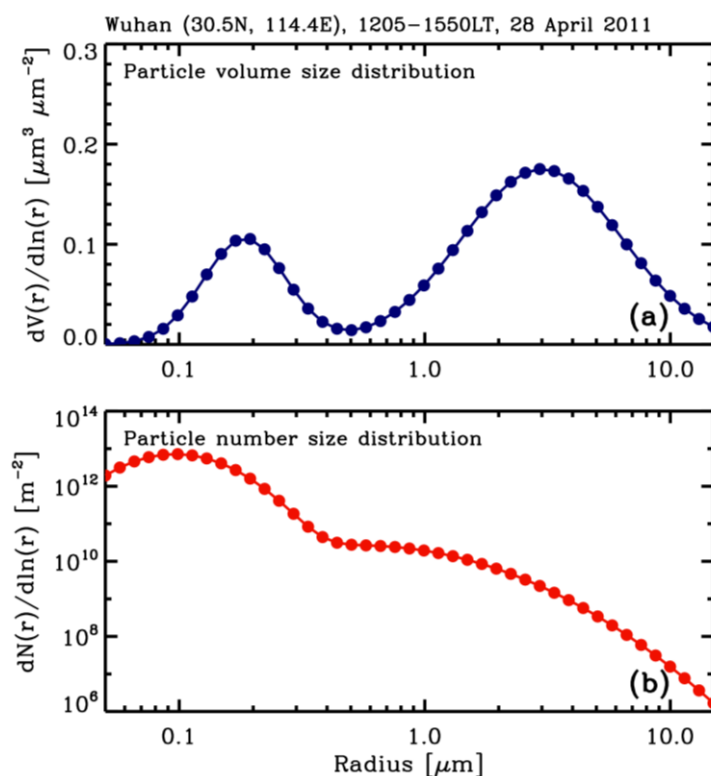

**Figure 4:** Column-integrated (a) particle volume size distribution and (b) particle number size distribution derived from sun photometer observations at Wuhan (30.5°N, 114.4°E) during 1205–1550 LT on 28 April 2011 based on GRASP-AOD algorithm. Ground-based polarization lidar observation verified that dust episodes occurred during this period.

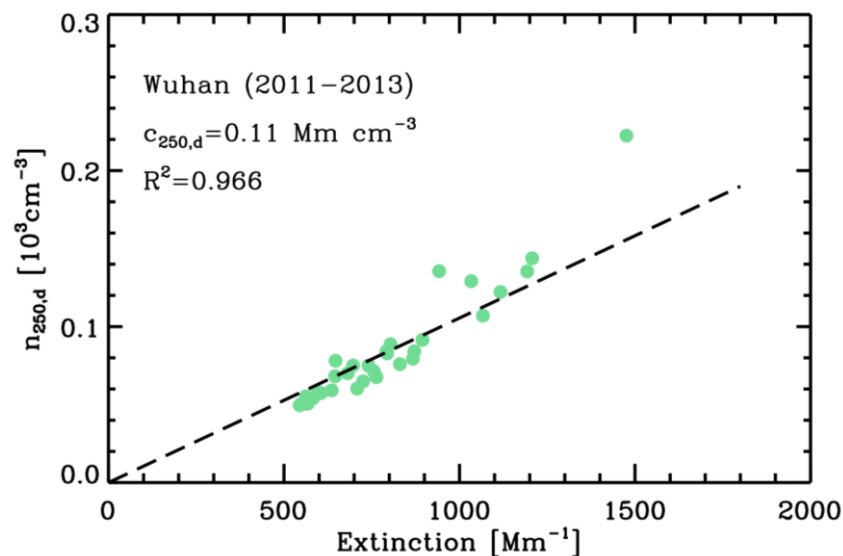

Figure 5: Relationship between extinction coefficient and large particle (with radius >250 nm) number concentration  $n_{250,d}$ . Correlations are given by sun photometer observations during dust-intrusion days that are verified by ground-based polarization lidar. Each point denotes a pair of daily averaged values for the dust-occurred period of a dust-intrusion day. The slope of the black dashed line indicates the mean increase in  $n_{250,d}$  with extinction coefficient, which is defined as the conversion factor  $c_{250,d} = 0.11 \text{ Mm cm}^{-3}$ . All the points are obtained from the dust-intrusion days during 2011–2013 by sun photometer.

560



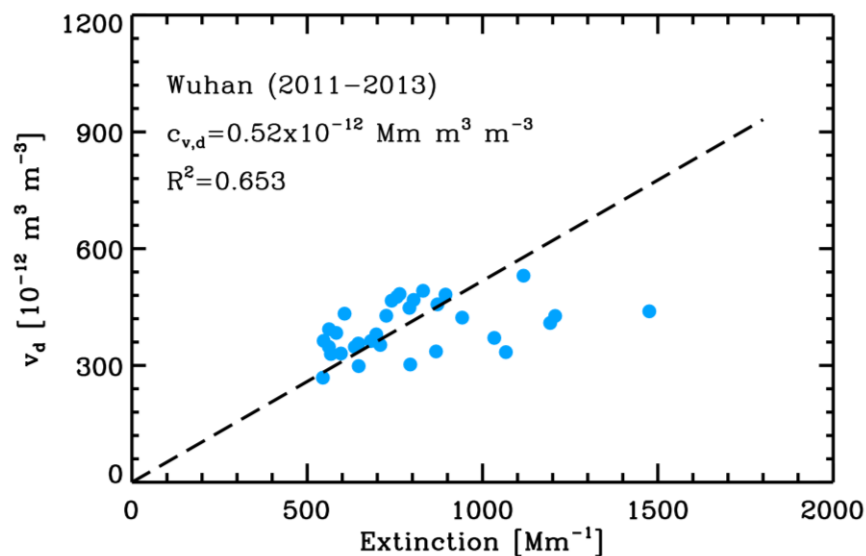

565 **Figure 6: Relationship between extinction coefficient and volume concentration  $v_d$ . Correlations are given by sun photometer observations during dust-intrusion days that are verified by ground-based polarization lidar. Each point denotes a pair of daily averaged values for the dust-occurred period of a dust-intrusion day. The slope of the black dashed line indicates the mean increase in  $v_d$  with extinction coefficient, which is defined as the extinction-to-volume conversion factor  $c_{v,d} = 0.52 \times 10^{-12} \text{ Mm m}^3 \text{ m}^{-3}$ . All the points are obtained from the dust-intrusion days during 2011-2013 by sun photometer.**

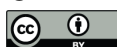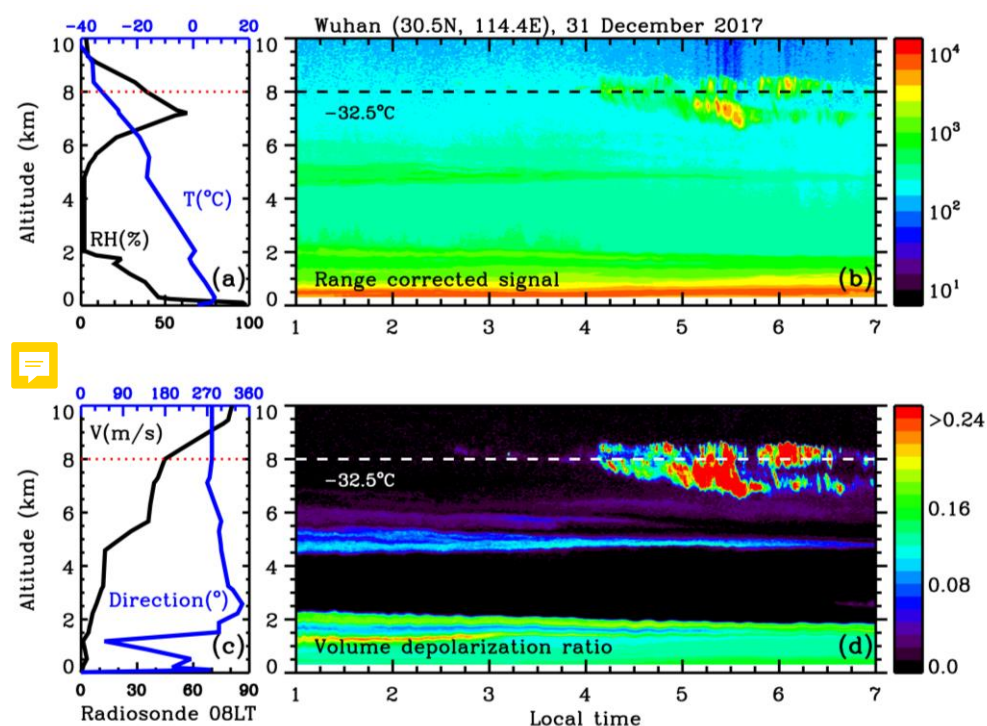

**Figure 7:** Time-height contour plots (1minute/30m resolution) of (b) range-corrected signal and (d) volume depolarization ratio measured by a 532 nm polarization lidar on 31 December 2017. Height profiles of (a) temperature and relative humidity, and (c) wind speed and wind direction measured with the radiosonde launched at 0800 LT. Horizontal lines indicate the  $-32.5^{\circ}\text{C}$  temperature height levels.

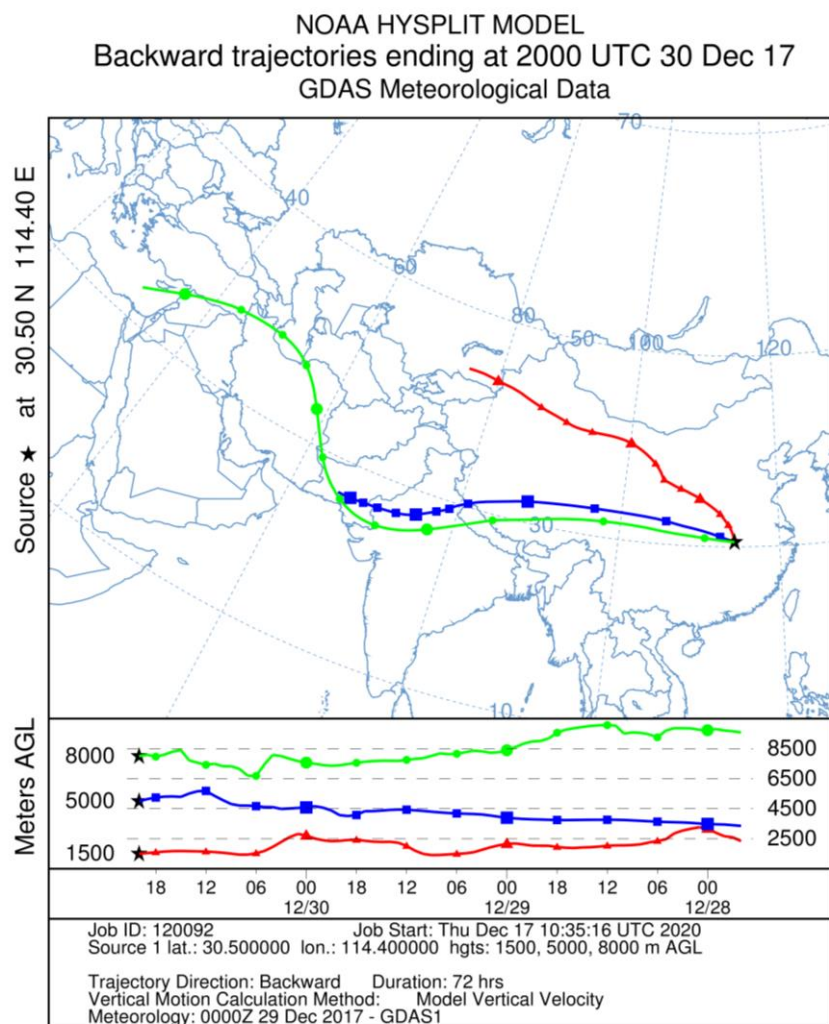

Figure 8: Three-day backward trajectories starting from Wuhan at 2000 UTC on 30 December 2017 (at 1.5 km, 5.0 km, and 8.0 km) are computed using the HYSPLIT model [Draxler and Rolph, 2003].

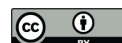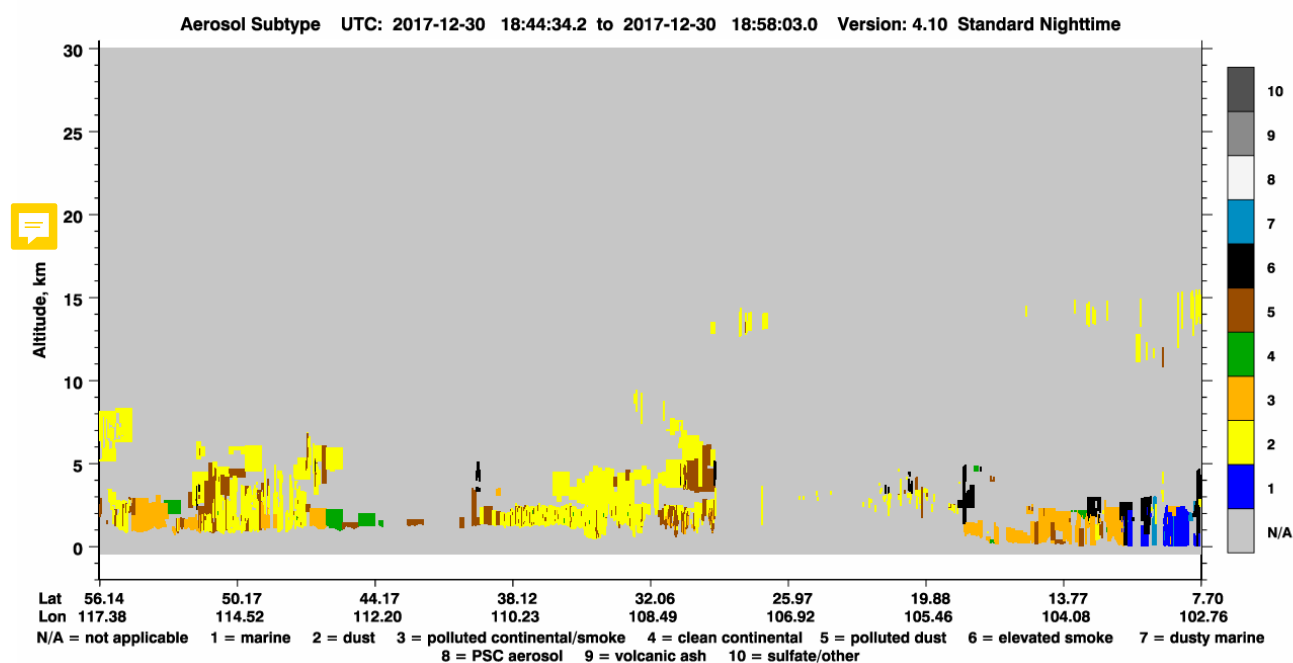

580

Figure 9: CALIPSO altitude-orbit cross-section measurements of aerosol subtype from 18:44:34 UTC to 18:58:03 UTC on 30 December 2017. The corresponding orbit is 2017-12-30T18-31-05ZN.

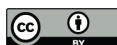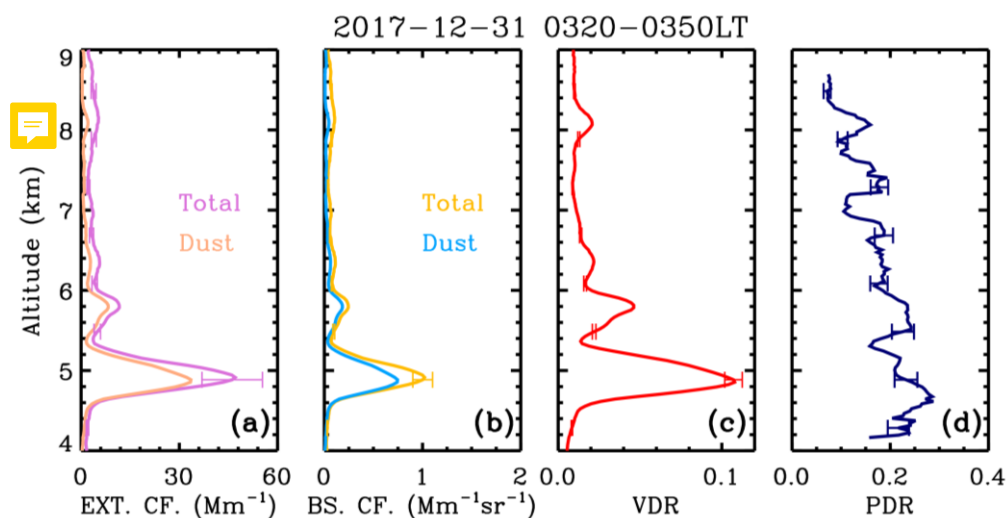

585 **Figure 10:** Profiles of the (a) dust and total (dust + non-dust) extinction coefficient, (b) dust and total (dust + non-dust) backscatter coefficient, (c) volume depolarization ratio  $\delta$ , and (d) particle depolarization ratio  $\delta_p$  derived by the 532 nm polarization lidar during 0320-0350 LT on 31 December 2017. Horizontal error bars denote the relative errors of each parameter.

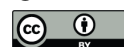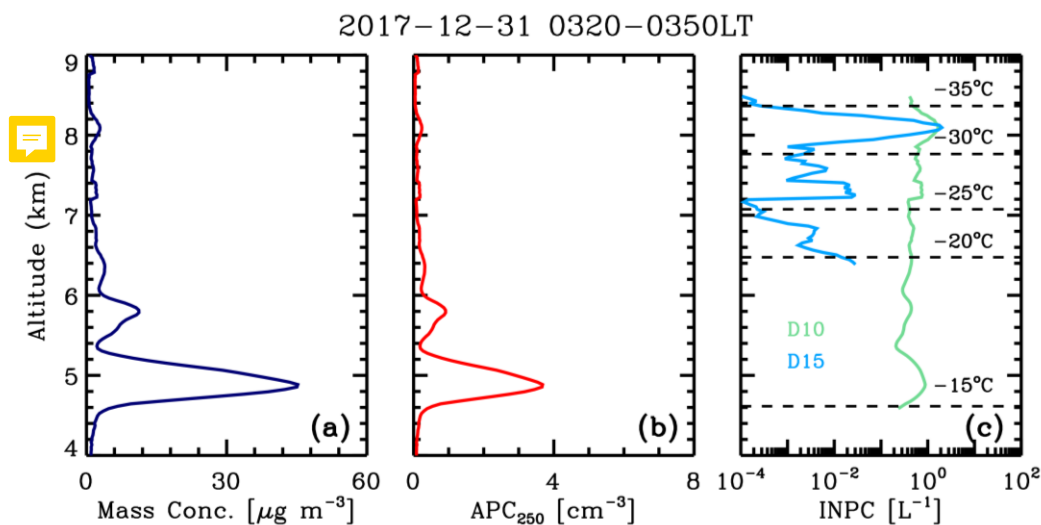

590 **Figure 11: Profiles of the (a) dust mass concentration  $M_d$ , (b) particle number concentration  $\text{APC}_{250}$ , (c) ice-nucleating particle concentration derived by the POLIPHON method during 0320-0350 LT on 31 December 2017. Horizontal dashed lines denote the temperature height levels of -15 °C, -20 °C, -25 °C, -30 °C, and -35 °C. The INPC profiles obtained by D10 and D15 parameterization scheme are both given.**
